# Supplementary material for: Nitrogen-Doped Hierarchical Porous Activated Carbon Derived from Paddy for High-Performance Supercapacitors
Source: MDPI journal article supplement (doi:10.3390/ma14020318), 2021-01-09
Supplement: s1 [file s1]

# Nitrogen-Doped Hierarchical Porous Activated Carbon Derived from Paddy for High-Performance Supercapacitors

Yudan Yuan <sup>1</sup>, Yi Sun <sup>2,3</sup>, Zhichen Feng <sup>2,3</sup>, Xingjian Li <sup>2,3</sup>, Ruowei Yi <sup>4,5</sup>, Wei Sun <sup>6</sup>, Cezhou Zhao <sup>1,2,5,\*</sup> and Li Yang <sup>4,5,\*</sup>

<sup>1</sup> School of Electronic and Information Engineering, Xi'an Jiaotong University, Xi'an 710049, China; yyd899@stu.xjtu.edu.cn

<sup>2</sup> Department of Electrical and Electronic Engineering, Xi'an Jiaotong-Liverpool University, Suzhou 215123, China; yi.sun@xjtlu.edu.cn (Y.S.); zhichen.feng19@student.xjtlu.edu.cn (Z.F.); xingjian.li14@student.xjtlu.edu.cn (X.L.)

<sup>3</sup> Department of Electrical Engineering and Electronics, University of Liverpool, Liverpool L69 3GJ, UK

<sup>4</sup> Department of Chemistry, Xi'an Jiaotong-Liverpool University, Suzhou 215123, China; ruowei.yi@xjtlu.edu.cn

<sup>5</sup> Department of Chemistry, University of Liverpool, Liverpool L69 7ZD, UK

<sup>6</sup> GMCC Electronic Technology Wuxi Co. Ltd., Wuxi 214000, China; wei.sun@hypcap.com

\* Correspondence: Cezhou.Zhao@xjtlu.edu.cn (C.Z.); Li.Yang@xjtlu.edu.cn (L.Y.)

**Citation:** Yuan, Y.; Sun, Y.; Feng, Z.; Li, X.; Yi, R.; Sun, W.; Zhao, C.; Yang, L. Nitrogen-Doped Hierarchical Porous Activated Carbon Derived from Paddy for High-Performance Supercapacitors. *Materials* **2021**, *14*(2), 318. <https://doi.org/10.3390/ma14020318>

Received: 18 December 2020

Accepted: 6 January 2021

Published: 9 January 2021

**Publisher's Note:** MDPI stays neutral with regard to jurisdictional claims in published maps and institutional affiliations.

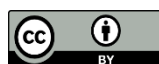

**Copyright:** © 2021 by the authors. Licensee MDPI, Basel, Switzerland. This article is an open access article distributed under the terms and conditions of the Creative Commons Attribution (CC BY) license (<http://creativecommons.org/licenses/by/4.0/>).

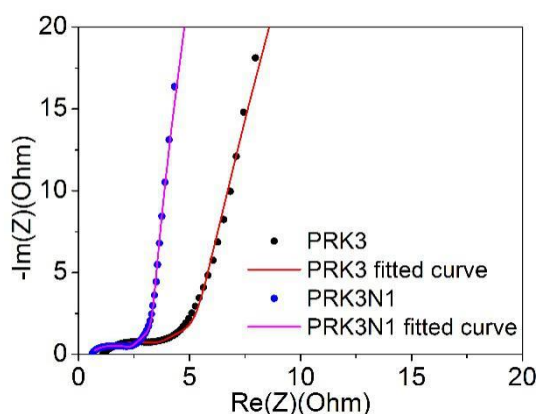

**Figure S1.** The fitted curves of PRK3 and PRK3N1.

**Table S1.** The simulation values of each element of PRK3 and PRK3N1 fitted in the equivalent circuit.

| Samples | $R_s$ ( $\Omega$ ) | $R_{ct}$ ( $\Omega$ ) | $C_1$ (F) | $C_2$ (F) | $Z_w$ ( $\Omega$ ) |
|---------|--------------------|-----------------------|-----------|-----------|--------------------|
| PRK3    | 1.08               | 2.50                  | 0.003     | 0.011     | 0.73               |
| PRK3N1  | 0.50               | 2.12                  | 0.004     | 0.015     | 0.19               |
